# Supplementary material for: Ultrafast star-shaped acoustic micromixer for high throughput nanoparticle synthesis
Source: Royal Society of Chemistry journal article supplement (doi:10.1039/c9lc01174a), 2019-12-23
Supplement: c9lc01174a2.pdf [file c9lc01174a2.pdf]

## Supplementary Information

### Ultrafast star-shaped acoustic micromixer for high throughput nanoparticle synthesis

Nguyen Hoai An Le<sup>a</sup>, Hao Deng<sup>a</sup>, Citsabehsan Devendran<sup>a</sup>, Nabila Akhtar<sup>b</sup>, Xiaoman Ma<sup>a</sup>, Colin Pouton<sup>b</sup>, Kim Chan<sup>c</sup> Adrian Neild<sup>a</sup> and Tuncay Alan<sup>a,\*</sup>

<sup>a</sup> Department of Mechanical and Aerospace Engineering, Laboratory for Microsystems, Monash University Melbourne VIC Australia

<sup>b</sup> Monash Institute of Pharmaceutical Sciences, Monash University Melbourne VIC Australia

<sup>c</sup> The Advanced Drug Delivery Group, Faculty of Pharmacy, University of Sydney, Sydney, NSW, Australia

\*Email: tuncay.alan@monash.edu

#### Stiffness Simulation

Mechanical stiffness of the cantilevered structures (Figure 7) were determined by a finite element analysis (ANSYS). A 3D model (Figure S1) was developed, meshed using quadratic tetrahedral elements. Fixed boundary conditions were applied at the outer perimeter. Anisotropic elastic properties of (111) oriented Si were used as material properties. A line load was applied at the inner perimeter of the structure, and the deformation was monitored as a function of the applied load. (Figure S2)

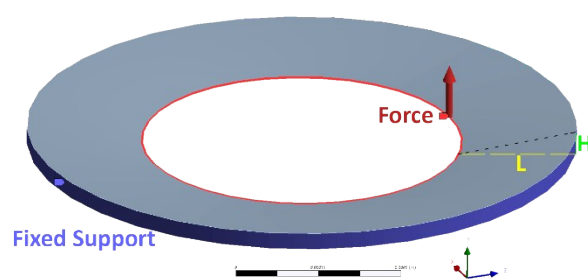

Figure S1 Model geometry and boundary conditions

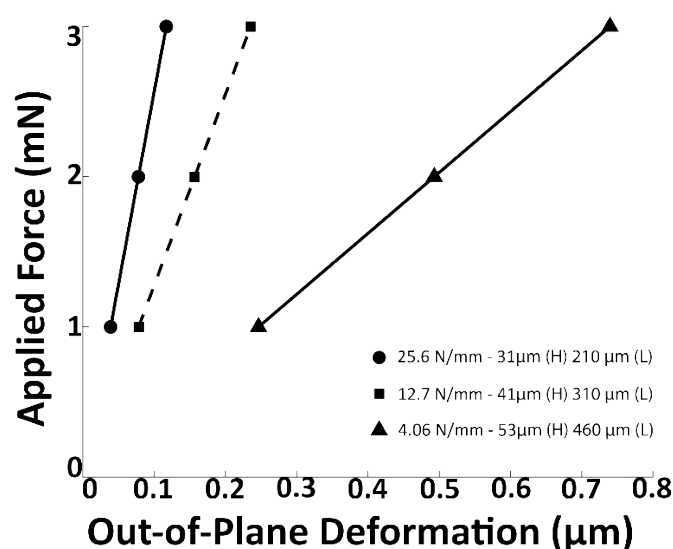

Figure S2 Load vs deflection for different cantilevered structures
